1 **Modified Technique for Dissection of Working Space in Retroperitoneal**  
2 **Laparoscopic Surgery**

3

4 **Running Title**

5 Modified dissection technique for creating retroperitoneal working space

6

7 **Authors:**

8 Xiaofeng Xu<sup>1#</sup>, Wen Cheng<sup>1#</sup>, Zhe Liu<sup>1</sup>, Changjie Shi<sup>1</sup>, Jianping Da<sup>1</sup>, Xiumin Zhou<sup>2\*</sup>, Jingping Ge<sup>1\*</sup>

9 <sup>#</sup>These authors contributed equally to this work

10 \* Correspondence author

11

12 **Author Affiliations:**

13 1.Department of Urology, Jinling Hospital, Medical School of Nanjing University, Nanjing, Jiangsu,  
14 China.

15 2.Department of Oncology, First Affiliated Hospital of Soochow University, Suzhou, Jiangsu, China.

16 **Corresponding author and e-mail address:**

17 Jingping Ge

18 Telephone: +86-25-80860025; Email: gjp\_doctor@qq.com

19 Xiumin Zhou

20 Telephone: +86-512-67973213; Email: alice-xm@163.com

21

22 **Word count (main text): 1973**

23 **Word count (abstract): 220**

24

25 **Keywords:** Modified dissection technique, Retroperitoneal working space, Laparoscopic dissection,  
26 Laparoscopic surgery

27

28

29

30

31 **Abstract**

32 **Introduction:** The existing techniques to creat working space for retroperitoneal laparoscopic surgery  
33 are often accompanied by air leakage or poor visibility due to blood and fat tissues smudging during  
34 dissection.This single-center experience describes a modified dissection technique to create a  
35 retroperitoneal working space during laparoscopic surgery.

36 **Materials and Methods:** From May 2021 to December 2022, we performed a modified dissection  
37 technique to create a retroperitoneal working space prior retroperitoneal laparoscopic surgery in 47  
38 patients. During the procedure, laparoscopic dissection is successively performed. The retroperitoneum  
39 is initially accessed by puncturing the trocar through a 10-mm transverse skin incision in the  
40 midaxillary line. Under endoscopic monitoring, the tip of the trocar is adjusted to a relative avascular  
41 layer between the transversus abdominis muscle and the pararenal fat. Laparoscopic dissection is  
42 performed to develop until the working space is fully established. All data referring to patient  
43 demographics, surgery, dilation-related complication, and perioperative outcomes were collected  
44 retrospectively.

45 **Results:** In all cases, a satisfactory retroperitoneal space was created for surgery. The median time of  
46 creating retroperitoneal working space was 6 (IQR:5,7) minutes. No dissection-related complications  
47 were noted within a median follow-up period of 9 (IQR:7,15) months.

48 **Conclusion:** Modified retroperitoneal dissection with laparoscopy is a safe, simple, effective, and  
49 minimally invasive technique. It provides an adequate working space and an excellent view without  
50 obvious bleeding.

51

52

53

54

55

56

57

58

59

60

## 61 **Introduction**

62 Creating an appropriate working space within the retroperitoneum is an essential prerequisite for  
63 retroperitoneal laparoscopic surgery. Early attempts at creating adequate space were mostly  
64 unsuccessful until the balloon dilation technique was first described by Gaur in 1992[1]. Consequently,  
65 the use of this technique has become increasingly popular worldwide. However, this technique utilizes  
66 an open surgical approach and air leakage is an inevitable problem after dilation because the incision  
67 for digital dissection is larger than the diameter of the trocar [2].

68 To overcome the complications associated with the existing techniques, we have implemented a  
69 modified dilation technique at our institution. This technique achieves retroperitoneal access by direct  
70 trocar puncture through a 10-mm incision. The laparoscopic dissection technique is used to dissect  
71 pararenal fat (PF) from the transversus abdominis muscle (TAM). Herein, we report our experience  
72 with this modified dilation technique.

73

## 74 **Materials and methods**

### 75 **Patients**

76 We have successfully applied this modified dilation technique in 47 cases of benign and malignant  
77 diseases of the upper retroperitoneum at our institution. Informed consent was obtained from all the  
78 patients. Perioperative data were collected retrospectively after obtaining approval from the  
79 Institutional Review Board of Jinling Hospital. Follow-up data were obtained by reviewing patient  
80 charts or via telephone calls.

### 81 **Step-by-step technique**

82 After inducing general anesthesia, the patient is placed in a full-flank position with the kidney bridge  
83 elevated. The surgical table is flexed to increase the distance between the ribs and iliac crest. A 10-mm  
84 transverse incision is made in the midaxillary line, approximately 2 cm above the iliac crest (Fig. 1a). A  
85 10-mm trocar is punctured perpendicularly through the muscular layers and transverse fascia and a  
86 10-mm, 30-degree laparoscope is inserted into the trocar. The laparoscopic view is turned to 30-degrees  
87 up. Under laparoscopic monitoring, the trocar is adjusted until its tip is within the layer between the  
88 TAM and the PF (Fig. 1b). This layer consists of semi-transparent loose and flimsy fibroareolar tissue  
89 and is relatively avascular. The eyepiece of the laparoscope is subsequently pushed downward. Using

90 this angle ensures that endoscopic vision remains in the proper layer (Fig. 1c). Thereafter, to-and-fro  
91 and side-to-side laparoscopic movements are performed to separate the fibrous septae, and the PF is  
92 bluntly detached from the undersurface of the flank abdominal wall. Accordingly, a working space is  
93 created between the TAM and PF.

94 There are several technical tips to ensure that laparoscopic dissection remains in the appropriate layer  
95 while using this technique. (1) Laparoscopic focus should be adjusted promptly when object distance is  
96 too small which will lead to obscure view. (2) The retroperitoneal fat is yellow, the TAM is red, and the  
97 fibroareolar tissue is semi-transparent. As the laparoscopic view is out of focus during dissection, these  
98 characteristics can be regarded as landmarks (Fig. 1d-1f). (3) Strong light from the laparoscope can  
99 transilluminate muscle and form a light spot on the skin. This can aid in locating the tip of the  
100 laparoscope (Fig. 1g). (4) The tip of the laparoscope should be pressed onto the undersurface of the  
101 flank abdominal wall and the wall will be tented during laparoscopic dissection. Thus, the movements  
102 of the laparoscope under the skin are palpable (Fig. 1g).

103 The dissection area extends from the anterior axillary line to the posterior axillary line. PF is mobilized  
104 en bloc from the transversalis fascia. Once the working space is fully established (Fig. 1h), additional  
105 ports are inserted under laparoscopic guidance. Subsequently, the surgical procedure can be performed.

#### 106 **Statistical analysis**

107 The following demographic and intraoperative variables were recorded: age, gender, body mass index  
108 (BMI), and the time of creating retroperitoneal working space which is defined as the time elapsed  
109 from the initial incision to the placement of all trocars. Complications were classified according to the  
110 Clavien-Dindo system.

111 Median and inter-quartile range (IQR) was used for continuous variables. Categorical variables were  
112 reported as percentages. Statistical analysis was performed by SPSS software version 22.0.

113

#### 114 **Results**

115 Patient demographic and clinical characteristics are detailed in Table 1. Using the laparoscope, we were  
116 able to adequately dissect the retroperitoneal space and obtain a satisfactory surgical field for all  
117 patients. The median time of creating retroperitoneal working space was 6 (IQR:5,7) min. All  
118 procedures were completed successfully. At a median follow-up of 9 (IQR:7,15) months, no  
119 dissection-related complications were observed.

120

121 **Discussion**

122 Currently, the Hasson and Veress needle techniques are the two major approaches used for  
123 retroperitoneal access and creating space for retroperitoneal laparoscopic surgery.

124 The Hasson technique is commonly used, wherein initial access and balloon placement for  
125 retroperitoneal laparoscopy are established using an open approach [1-4]. A 1.5-2.0 cm incision is made  
126 just below the tip of the 12<sup>th</sup> rib in the posterior axillary line, and the lumbodorsal fascia and muscle  
127 fibers are bluntly separated using artery forceps [1,3]. Thereafter, the peritoneum is digitally pushed  
128 forward to create a retroperitoneal space. Lastly, a balloon is inserted to fully dilate the retroperitoneal  
129 space.

130 Using this technique, intracorporeal manipulation is not performed under direct vision and it is  
131 associated with the risk of improper dilation between muscle layers caused by balloon misplacement.

132 Intramuscular dilation can lead to musculature tearing and bleeding, possibly resulting in conversion to  
133 an open procedure or postoperative hernia [4]. Furthermore, if the balloon is inserted too deep and  
134 dilates within the Gerota fascia, the renal vein can tear [5]. These complications can be avoided by  
135 direct visualization using a commercially available transparent balloon where the laparoscope is  
136 inserted into the balloon and the proper position of the balloon is confirmed endoscopically. However,  
137 this results in higher costs. Another alternative is the use of ultrasound to confirm the position of the  
138 balloon [6]. In addition, even if the incision is as small as possible, air leakage around the balloon  
139 trocar remains a problem because the index finger is thicker than the 10-mm trocar. Thus, airtight  
140 instruments or sutures must be adopted to ensure an airtight incision [2].

141 During the Veress needle technique, the Veress needle is inserted and followed by “blind” trocar  
142 puncture at the midaxillary or posterior axillary lines through a 10-mm skin incision. However, this  
143 procedure is associated with several complications [7]. First, the fibroareolar tissue binds to the PF in  
144 the retroperitoneum and can not be sufficiently broken down by CO<sub>2</sub> insufflation via the Veress needle  
145 alone. It is thus difficult to obtain an adequate working space, and breaking the fibroareolar septa via  
146 laparoscopy is needed. Second, the tip of the trocar will be inserted into the PF (between the psoas  
147 muscle posteriorly and Gerota’s fascia anteriorly) or perirenal fat (within Gerota’s fascia) due to the  
148 “blind” puncture [8]. Further laparoscopic dissection is performed within fatty tissues, and en bloc fat  
149 is separated into several parts, which is often accompanied by vascular breakage. Lastly, laparoscopic

150 visibility is often obscured by blood and fat tissue, and this technique is associated with frequent  
151 smudging of the laparoscope and a lack of anatomical landmarks [9]. An insufficient endoscopic view  
152 may result in complications, such as pneumothorax [6,7].

153 Because of the disadvantages of the existing dilation techniques, a modified technique for creating a  
154 retroperitoneal working space was introduced at our institution. In this procedure, initial access is  
155 obtained by trocar puncture through a 10-mm skin incision without the use of digital dissection.  
156 Therefore, air leakage due to a larger incision can be avoided. The tip of the trocar is adjusted to the  
157 plane between the TAM and the PF under laparoscopic monitoring. This is important because this layer  
158 is composed of semi-transparent loose and flimsy fibroareolar tissue and is nearly avascular. This  
159 facilitates a clear laparoscopic view during dissection and en bloc dissection of the PF from the  
160 transversalis fasci.

161 After proper layer entry, dissection movements of the laparoscope are performed. The different visual  
162 characteristics of the transversus abdominis muscle, PF, and fibroareolar tissue act as laparoscopic  
163 anatomical landmarks, which guarantees that the correct layer is dissected. In our experience, proper  
164 layer entry can fill areolar tissue with gas, which contributes to the en bloc mobilization of the PF from  
165 the transversalis fasci.

166 Furthermore, both the tented portion of the flank abdominal wall and the light spot on the skin from the  
167 laparoscope could indicate the precise position of the dilation. These factors also contribute to the  
168 avoidance of mis- or overdistention. Ultimately, a clear laparoscopic view with rare hemorrhage is  
169 possible.

170 This modified technique offers several unique advantages. First, the skin incision is small, and no blunt  
171 dissection of the fascia and muscle with artery forceps is performed. Therefore, intraoperative air  
172 leakage is avoided. Mattress sutures or airtight systems are not necessary. Second, a preliminary blunt  
173 dissection is performed between the PF and transversalis fasci and not inside the PF. This ensures a  
174 clean laparoscopic view because this layer is a relatively avascular semi-transparent reticular fibrous  
175 structure. Lastly, manipulation of the entire process is performed using endoscopic monitoring.  
176 Therefore, the complications associated with balloon misplacement can be avoided.

177

## 178 **Conclusion**

179 This modified technique is simple and requires limited experience and technical skills. The procedure

180 is performed under distinct endoscopic monitoring, which minimizes the risk of injury from obscured  
181 vision or “blind” manipulation. It not only provides a clear working space but also facilitates further  
182 dissection of the PF en bloc off Gerota’s fascia. In summary, the modified dilation technique was  
183 initially proven safe and effective.

184

185 **Author contributions** X.F.X. conceived the idea, initial drafting of the article. Cheng: Data collection  
186 and data analysis, initial drafting of the article. Z.L., C.J.S., and J.P.D. Data collection. X.M.Z.  
187 Interpretation of data, critical revision of the article. J.P.G. Interpretation of data, critical revision of the  
188 article.

189

#### 190 **Author Disclosure Statement**

191 The authors declare no conflict of interest.

192

#### 193 **Funding Information**

194 This work was supported by National Natural Science Foundation of China (NSFC81972841).

195

196

197

198

199

200

201

202

203

204

205

206

207

208

209

210

211

212 **References**

- 213 1. Gaur DD. Laparoscopic operative retroperitoneoscopy: use of a new device. *J Urol*  
214 1992;148(4):1137-1139; doi: 10.1016/s0022-5347(17)36842-8.
- 215 2. Gill IS. Retroperitoneal laparoscopic nephrectomy. *Urol Clin North Am* 1998;25(2):343-360; doi:  
216 10.1016/s0094-0143(05)70023-9.
- 217 3. Gaur DD, Agarwal DK, Purohit KC. Retroperitoneal laparoscopic nephrectomy: initial case report. *J*  
218 *Urol* 1993;149(1):103-105; doi: 10.1016/s0022-5347(17)36012-3.
- 219 4. Adams JB 2nd, Micali S, Moore RG, et al. Complications of extraperitoneal balloon dilation. *J*  
220 *Endourol* 1996;10(4):375-378; doi: 10.1089/end.1996.10.375.
- 221 5. Gaur DD, Rathi SS, Ravandale AV, et al. A single-centre experience of retroperitoneoscopy using the  
222 balloon technique. *BJU Int* 2001;87(7):602-606; doi: 10.1046/j.1464-410x.2001.02149.x.
- 223 6. Rassweiler JJ, Henkel TO, Stoch C, et al. Retroperitoneal laparoscopic nephrectomy and other  
224 procedures in the upper retroperitoneum using a balloon dissection technique. *Eur Urol*  
225 1994;25(3):229-236; doi: 10.1159/000475289.
- 226 7. Kerbl K, Figenshau RS, Clayman RV, et al. Retroperitoneal laparoscopic nephrectomy: laboratory  
227 and clinical experience. *J Endourol* 1993;7(1):23-26; doi: 10.1089/end.1993.7.23.
- 228 8. McDougall EM, Clayman RV, Fadden PT, et al. Retroperitoneoscopy: the Washington University  
229 Medical School experience. *Urology* 1994;43(4):446-452; doi: 10.1016/0090-4295(94)90228-3.
- 230 9. Partin AW, Domochofski RR, Kavoussi LR, Peters CA (eds). *Campbell-Walsh-Wein Urology*, 12th  
231 edn. Elsevier, Philadelphia, PA, 2021.

232

233

234

235

236

237

238

239

240

241

242

243



244

245

246 **Figure Legends**

247 **Fig. 1** Key procedures of the modified dissection technique for creating an adequate retroperitoneal  
248 working space.

249 **a** The patient in a full-flank position. The first trocar is punctured perpendicularly through a 10-mm  
250 incision (black arrow) in the midaxillary line, approximately 2 cm above the iliac crest. The 12th rib  
251 and iliac crest have been marked. **b** Telescopic view of the 30-degree up from the first trocar. The  
252 trocar tip (black arrow) is adjusted to the relatively avascular layer (RAL) between the transversus  
253 abdominis muscle (TAM) and pararenal fat (PF). **c** Laparoscopic dissection within the RAL. **d,e,f** The  
254 laparoscopic view is out of focus during dissection. The PF is yellow, the TAM is red, and the RAL is  
255 semi-transparent. These characteristics can be regarded as landmarks. **g** Strong light from the  
256 laparoscope transilluminates the muscle and forms a light spot on the skin. Movements of the  
257 laparoscope are palpable by hand simultaneously. **h** The working space is fully established. PF is  
258 mobilized en bloc from the transversalis fascia. A clear laparoscopic view without hemorrhage is  
259 observed

260

261 **Fig. 2** Perforator vessel in fibroareolar tissue (black arrow)

262

263 **Table 1** Demographic and clinical characteristics of the 47 patients with modified dissection technique.

| Variable                                                                  | Value              |
|---------------------------------------------------------------------------|--------------------|
| Age, years, median (IQR)                                                  | 54 (47.5, 62)      |
| Gender, n (%)                                                             |                    |
| Male                                                                      | 22 (46.8)          |
| Female                                                                    | 25 (53.2)          |
| BMI, kg/m <sup>2</sup> , median (IQR)                                     | 25.68 (21.7, 27.6) |
| Retroperitoneoscopic procedures                                           |                    |
| Radical nephrectomy                                                       | 5                  |
| Nephrectomy                                                               | 3                  |
| Partial nephrectomy                                                       | 23                 |
| Adrenalectomy                                                             | 13                 |
| Renal pedicle lymphatic disconnection for chyluria                        | 1                  |
| Renal cyst decortication                                                  | 1                  |
| Nephroureterectomy                                                        | 1                  |
| Total                                                                     | 47                 |
| Time of creating retroperitoneal working<br>space (minutes), median (IQR) | 6 (5, 7)           |
| Dissection-related complications (%)                                      | 0 (0)              |

264 BMI=body mass index; IQR=inter-quartile range;

265

266

267



1A

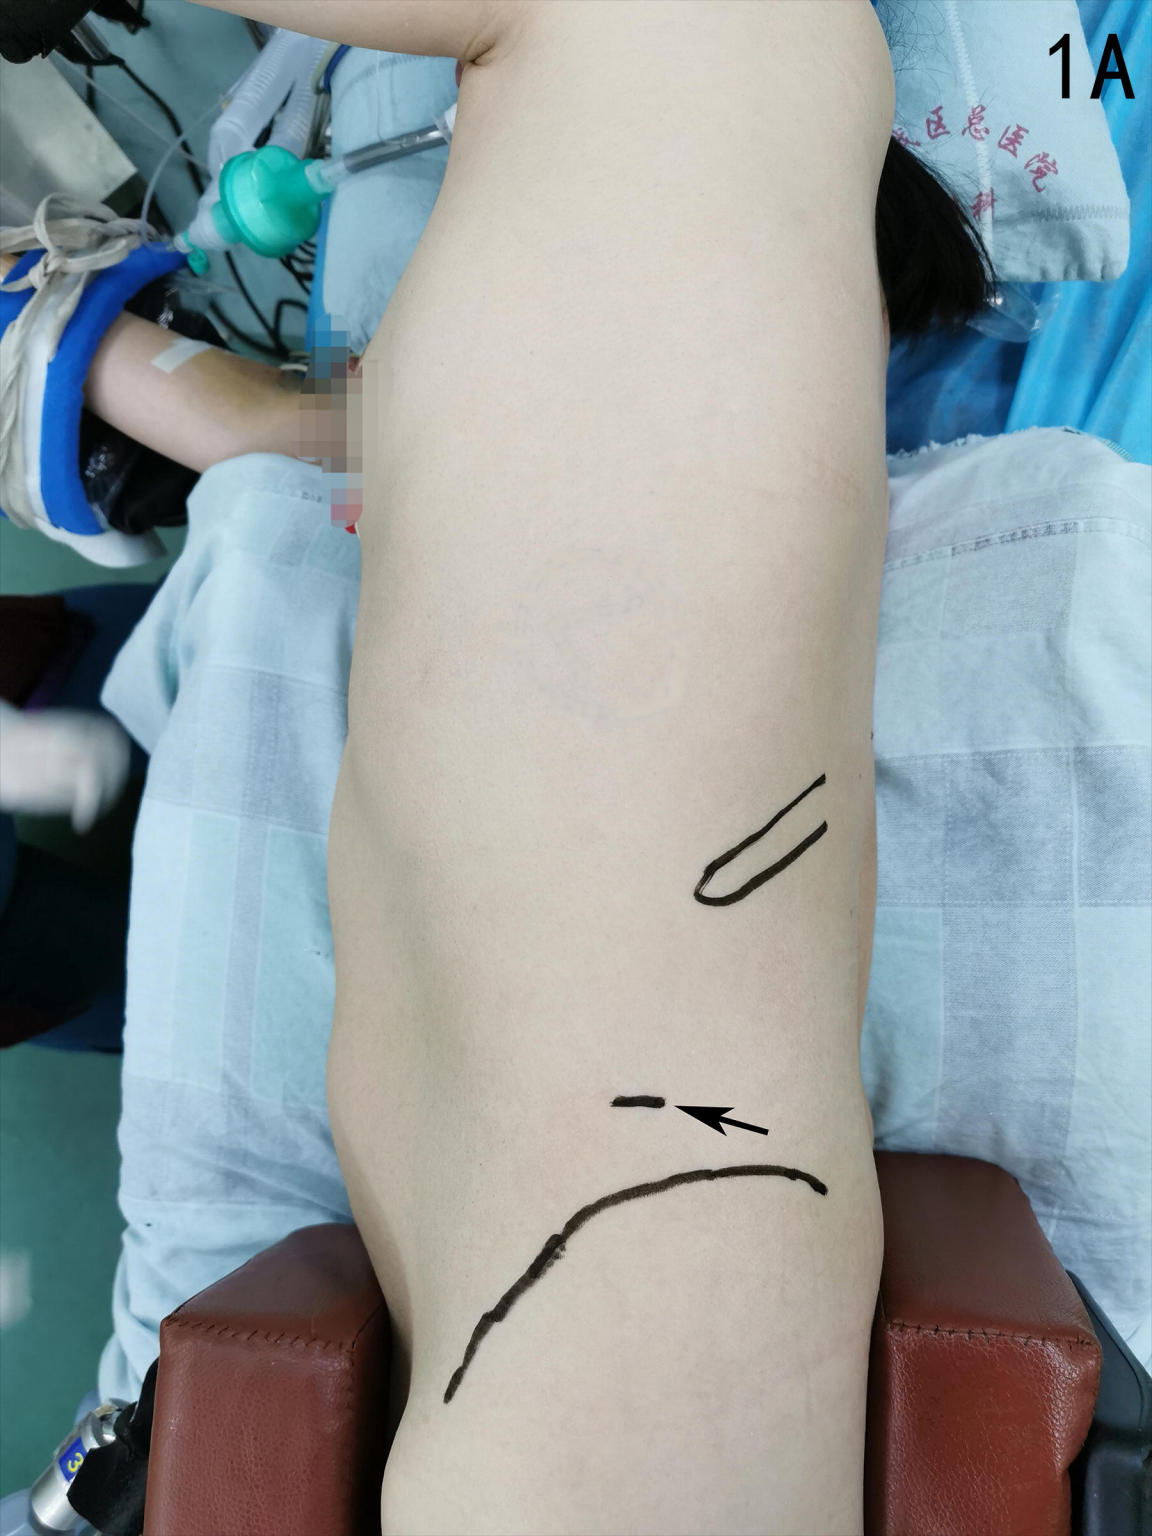

1B

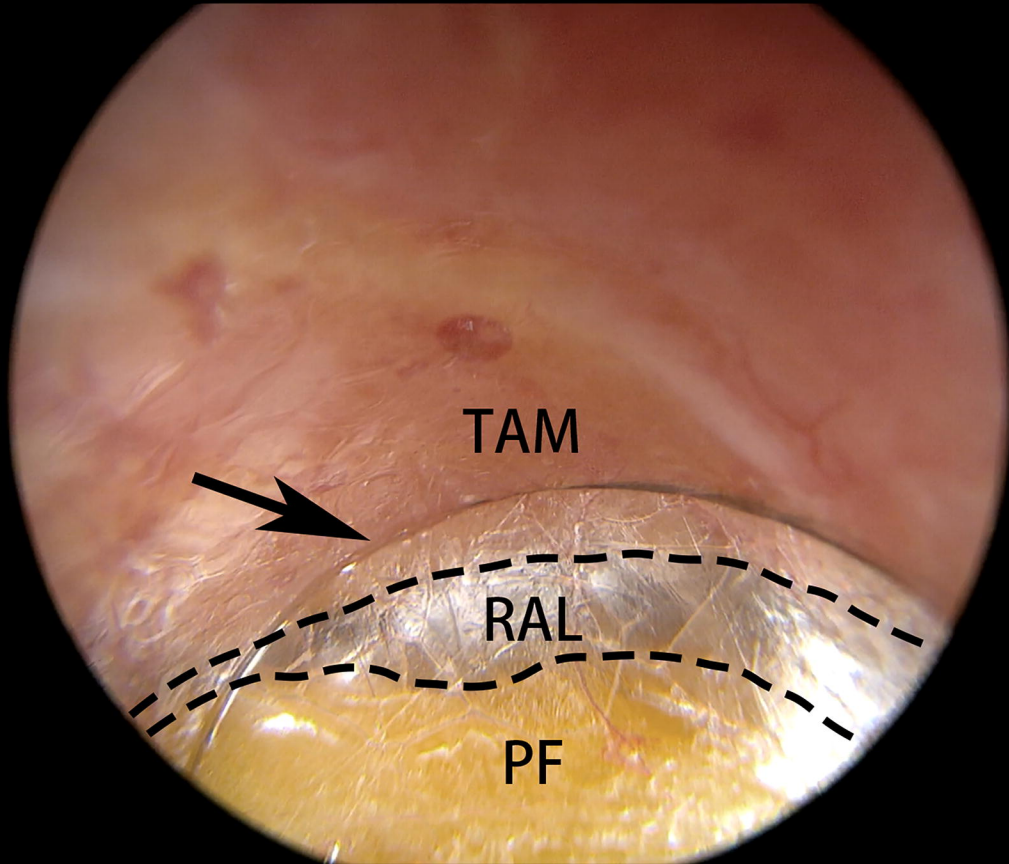

1C

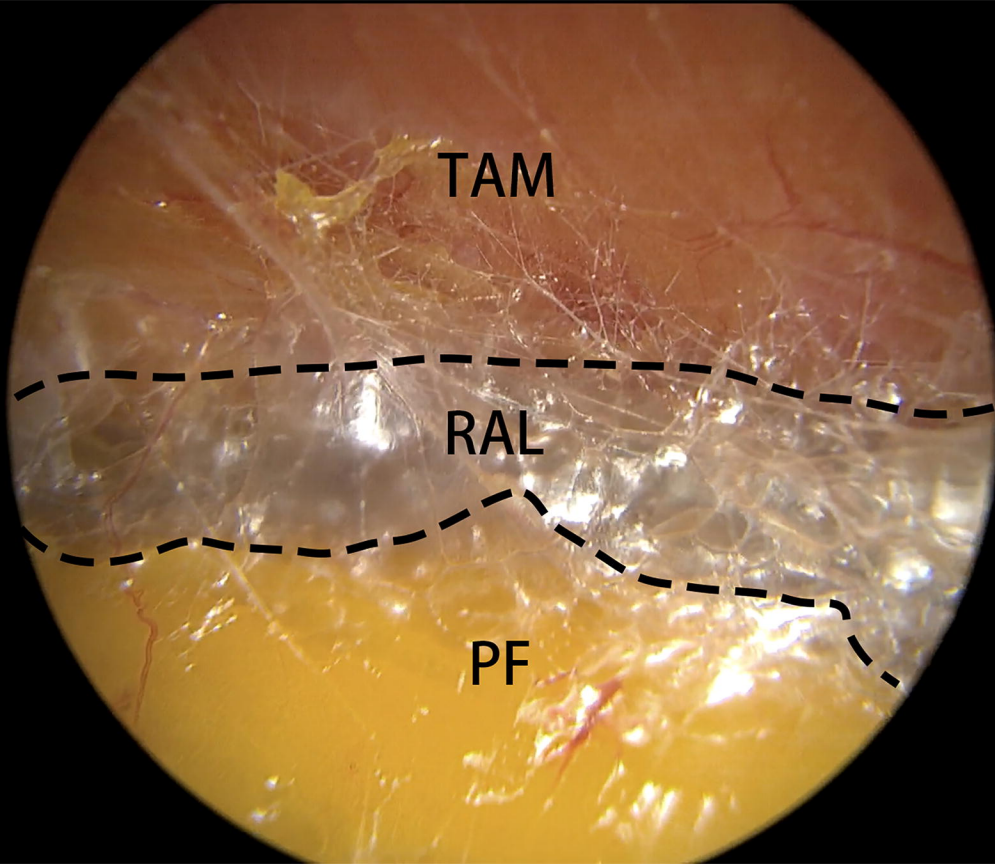

1D

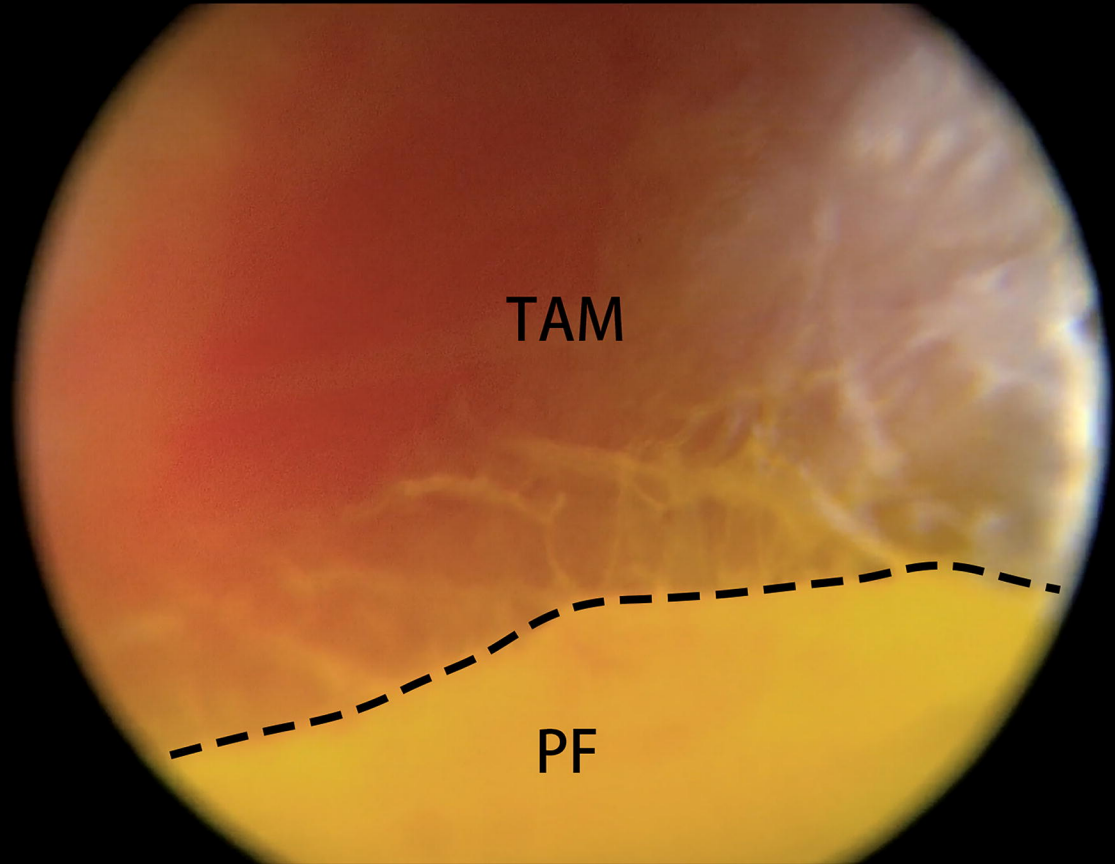

TAM

PF

1E

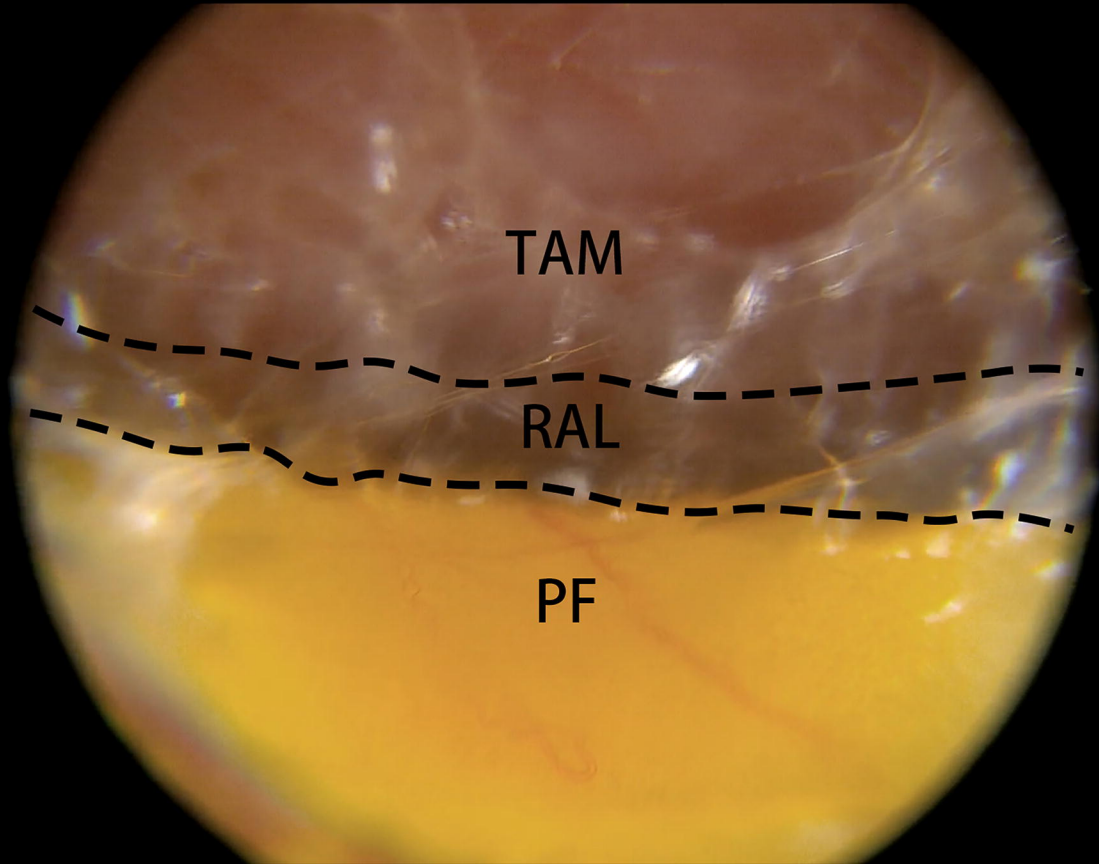

1F

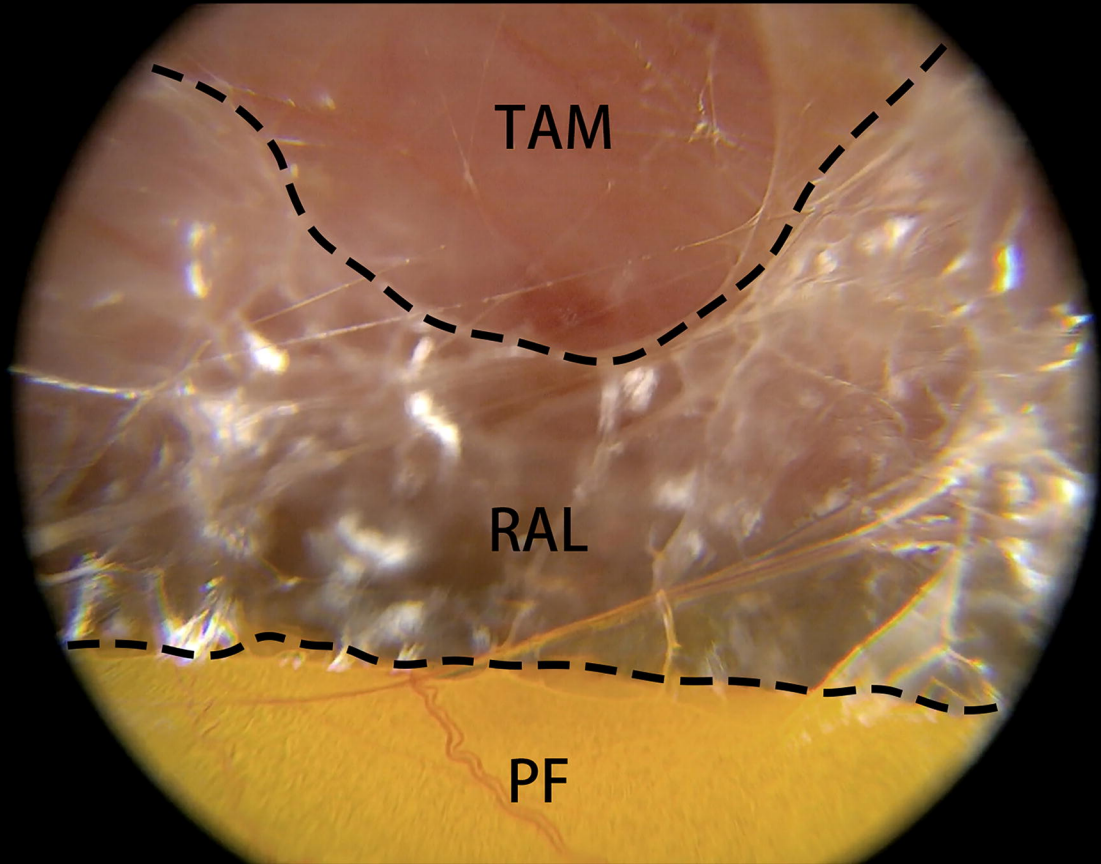



1G

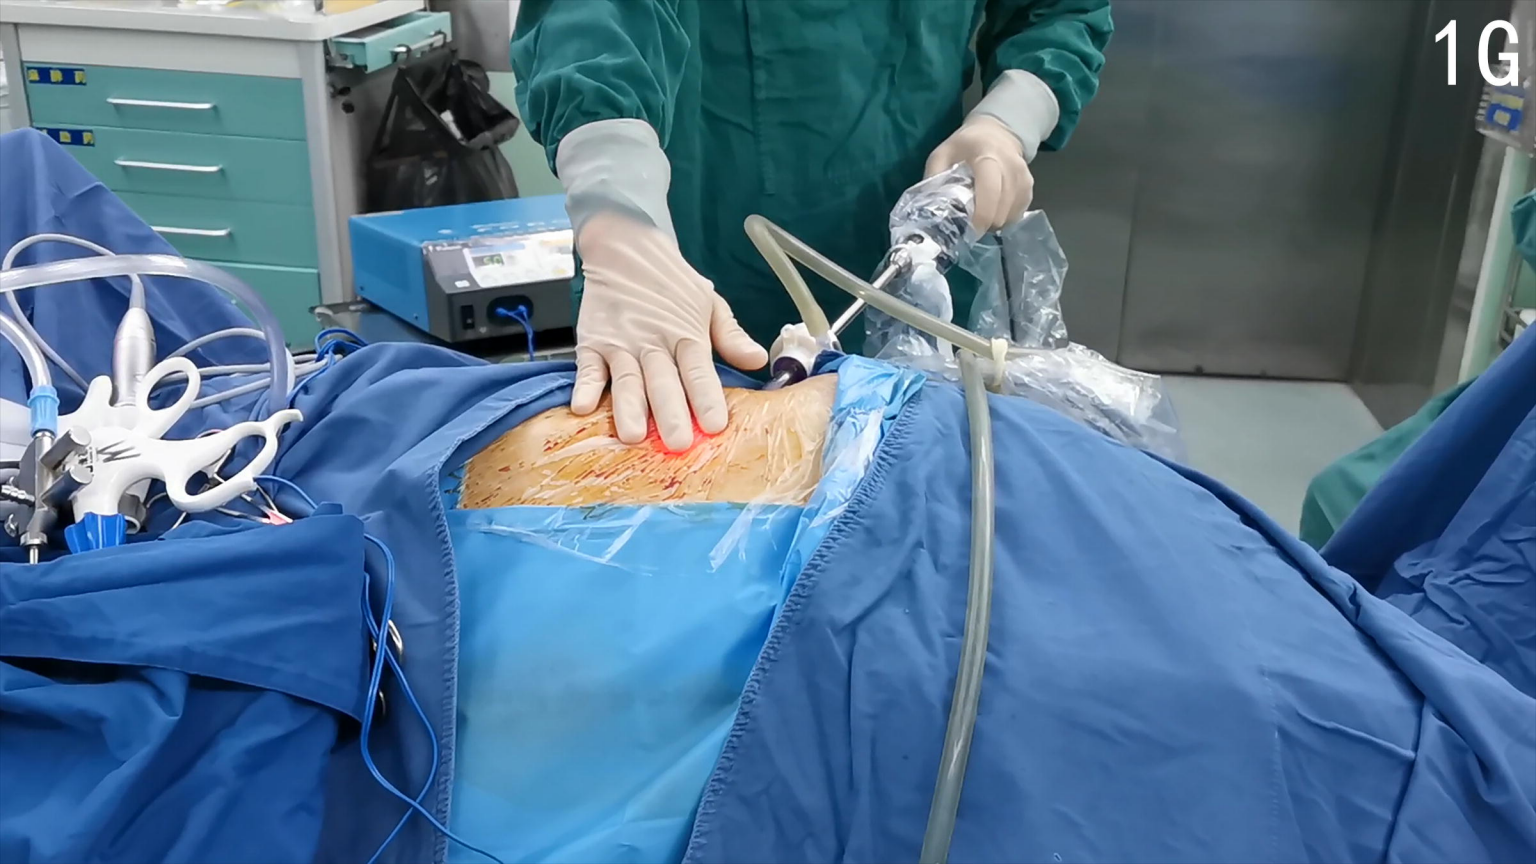

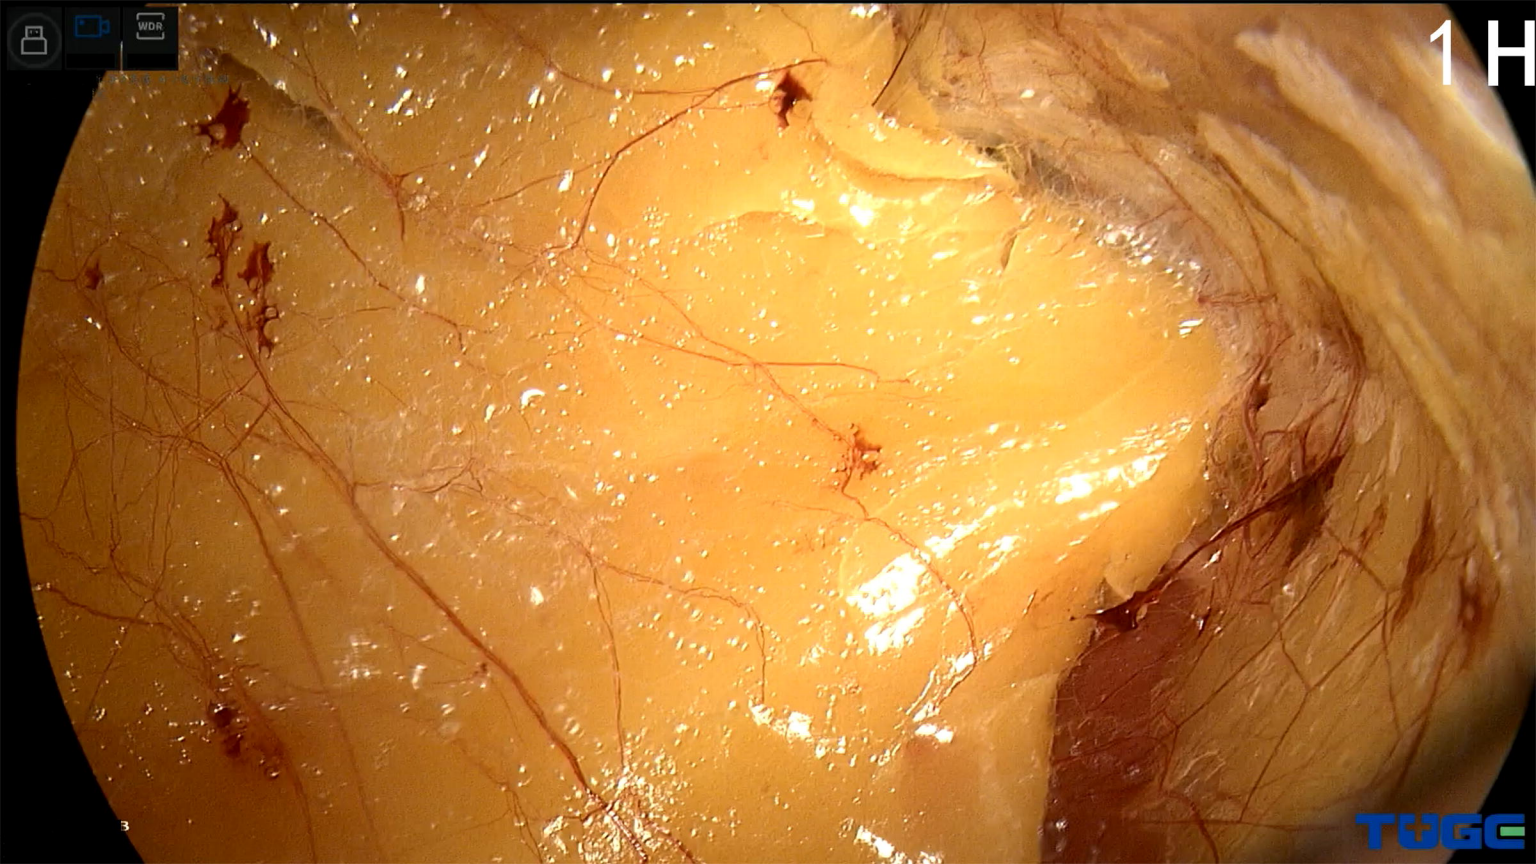

1 H

TUGG

2

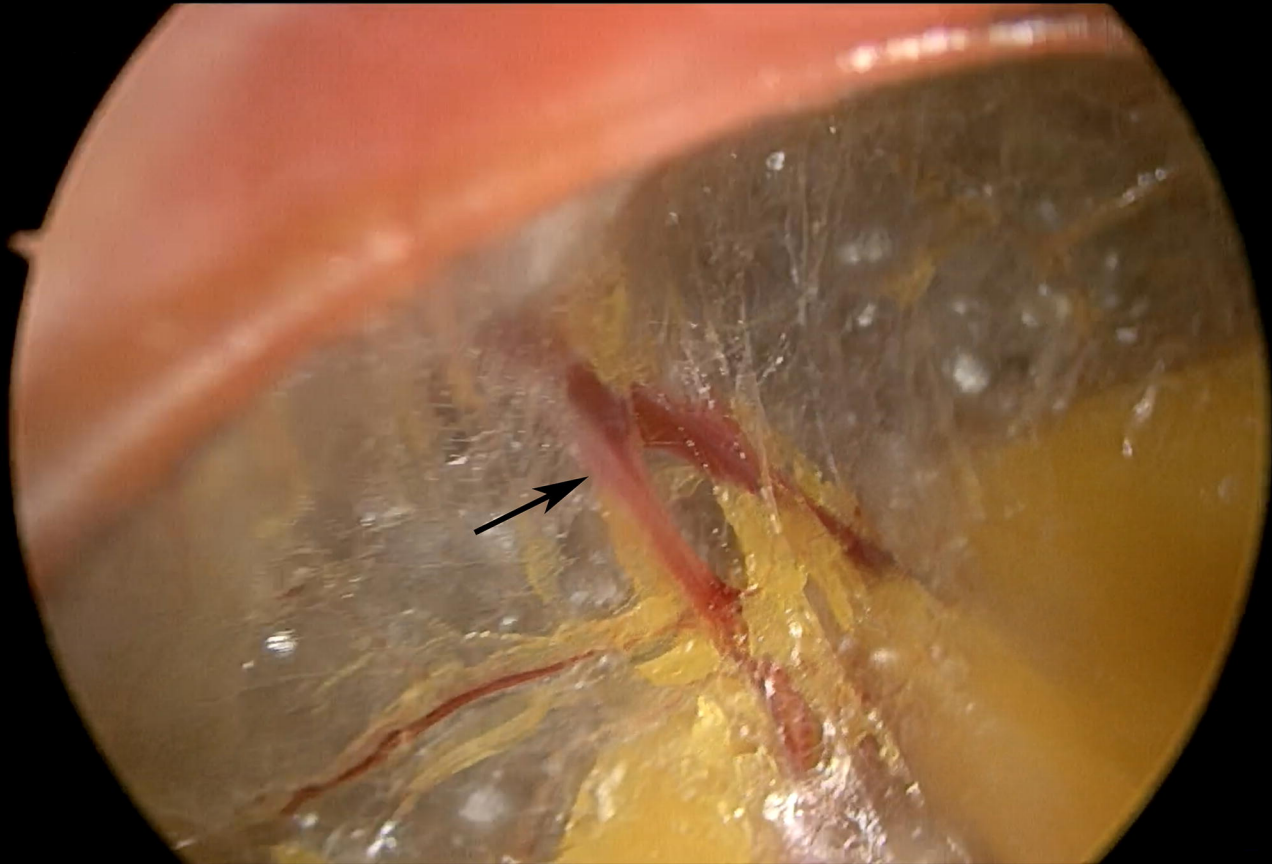

Source: https://medrxiv.org/content/10.1101/2023.06.18.23291359v2.full.pdf
